# Supplementary material
Source: publisher site journal article supplement (https://www.spandidos-publications.com/641/downloadSupplementary)

Figure S1. Combined treatment with VC and rutin promotes the formation of PDLSC sheets. PDLSCs were cultured in  $\alpha$ -minimum essential medium with or without VC (20  $\mu$ g/ml) and rutin ( $1 \times 10^{-6}$  mol/l) for 3 days. (A) OD values of the control group, VC group, VC + rutin group and rutin group on day 3. (B) Representative images of cell sheets in culture dishes. \* $P < 0.05$ , \*\* $P < 0.01$ . VC, vitamin C; PDLSC, periodontal ligament stem cell.

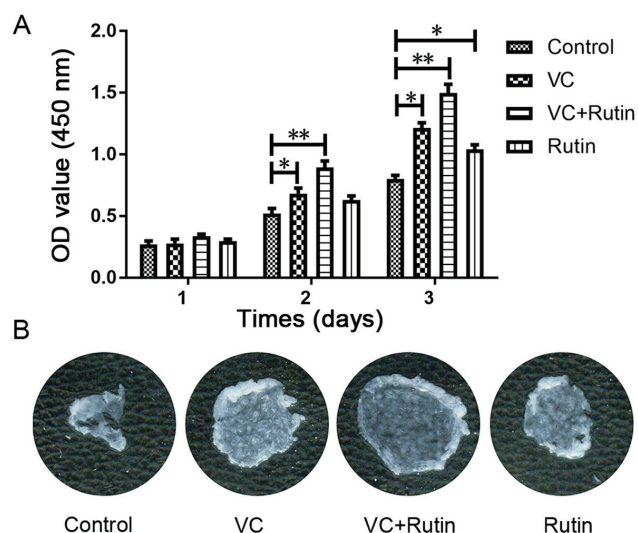

Supplement: Supplementary file 1 [file downloadSupplementary]
